# Supplementary material for: Phosphatidylinositol 4-kinase III beta regulates cell shape, migration, and focal adhesion number
Source: PubMed Central journal article supplement — Mol Biol Cell. 2020 Aug 1;31(17):1904–16. doi: 10.1091/mbc.E19-11-0600 (PMC7525810; doi:10.1091/mbc.e19-11-0600), 2020-08-01
Supplement: mbc-31-1904-s001.pdf [file mbc-31-1904-s001.pdf]

# Supplemental Materials

*Molecular Biology of the Cell*

Bilodeau *et al.*
